# Supplementary material
Source: Springer Nature journal article supplement (https://www.springermedizin.de/resource/supplementary/12974_2014_978_MOESM6_ESM.pdf/9600560)

**A**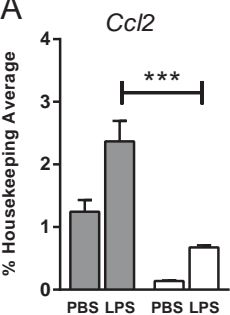**B**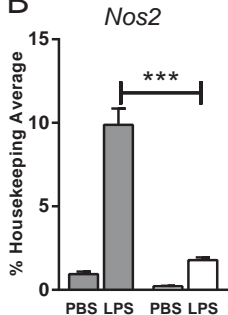**C**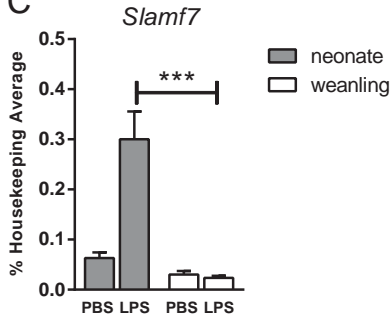**D**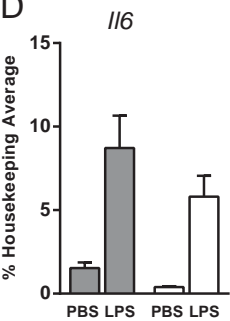**E**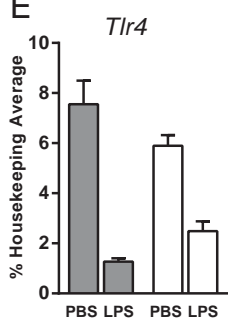**F**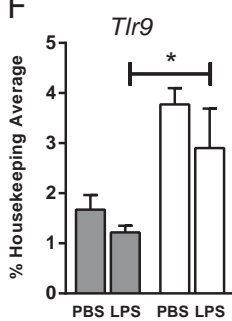

Supplement: MOESM6 [file 9600560]
